# Supplementary material for: Identification of Candidate Genes and MicroRNAs for Acute Myocardial Infarction by Weighted Gene Coexpression Network Analysis
Source: Hindawi journal article supplement (doi:10.1155/2019/5742608), 2019-02-11
Supplement: f1 [file 5742608.f1.pdf]

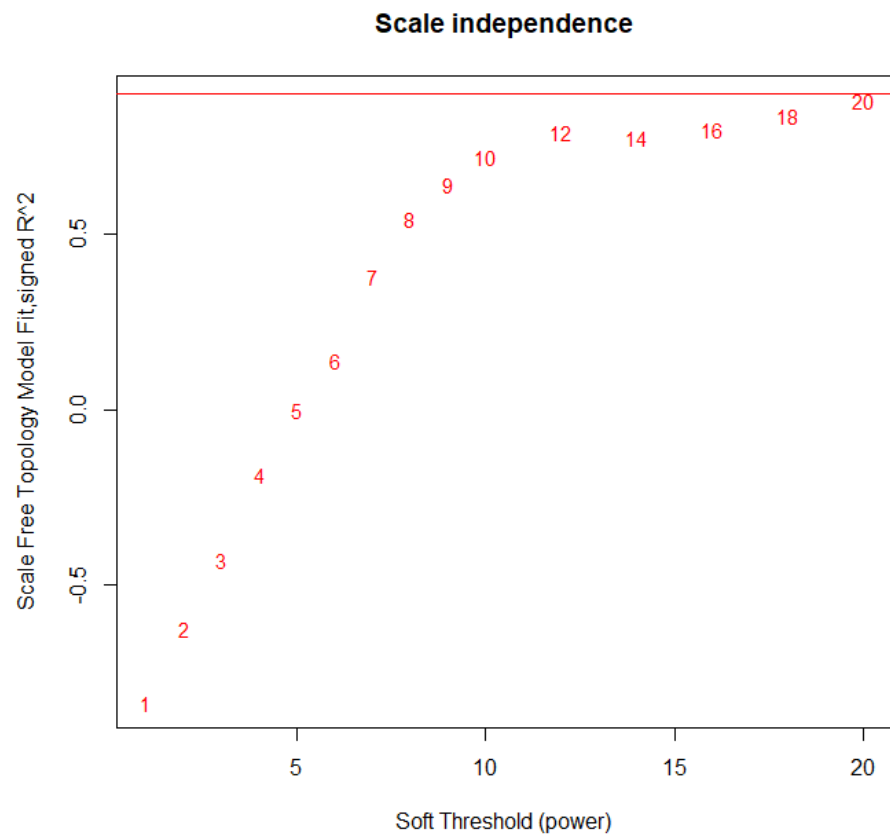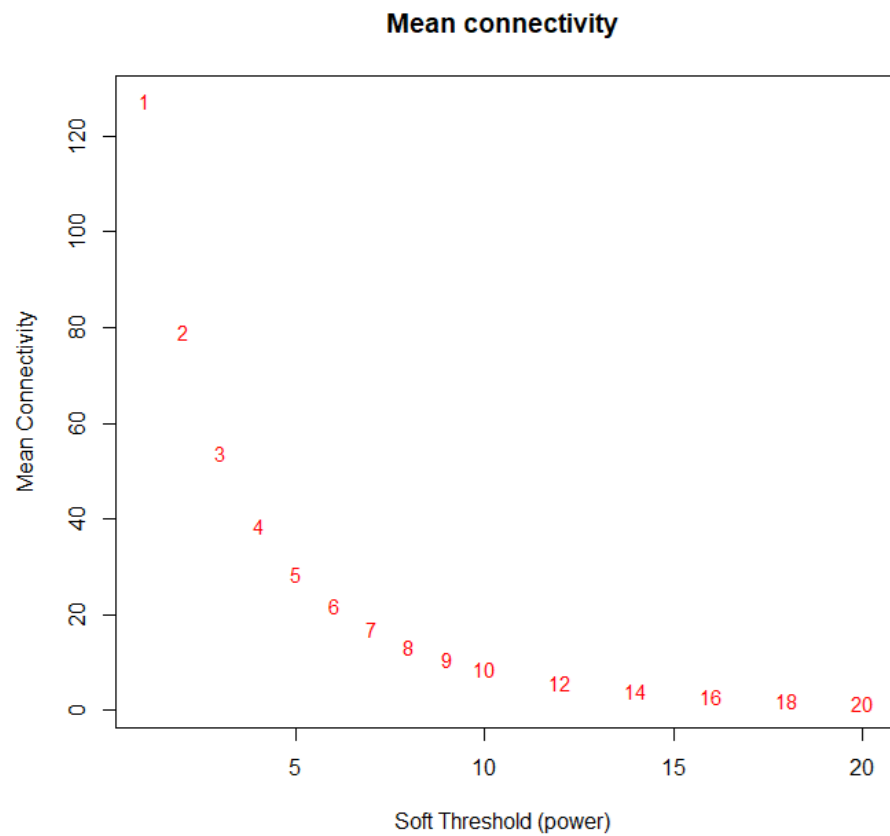

Supplementary Figure 1. Picking up a soft-threshold approximating to a scale free topology criterion based on R square and mean connectivity

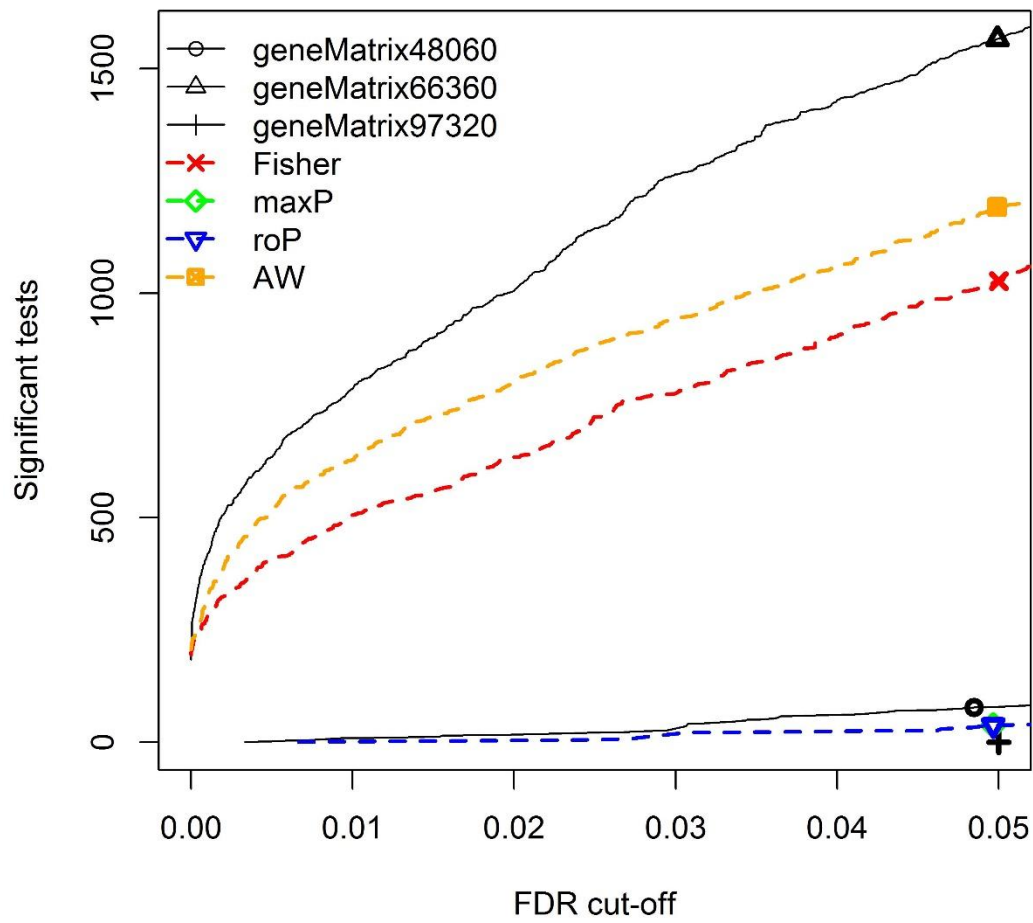

Supplementary Figure 2. Number of detected DEGs under different  $q$ -value threshold

### Module-trait relationships

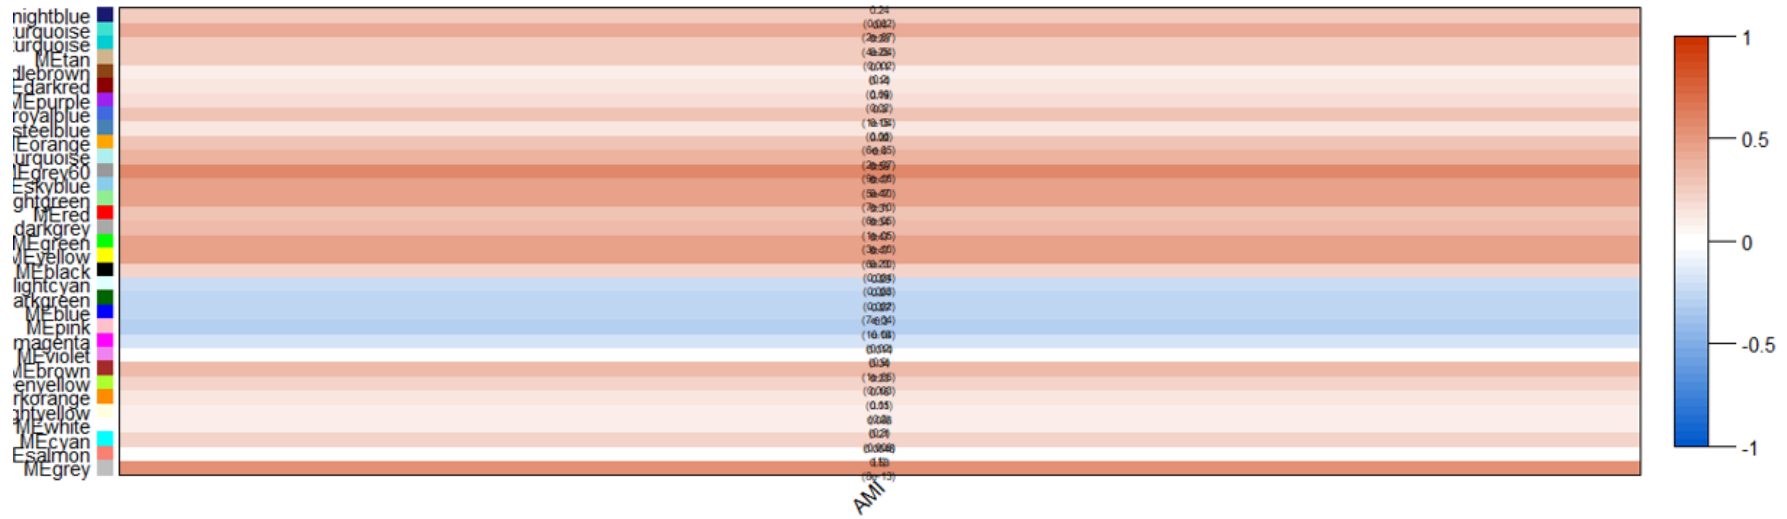

Supplementary Figure 3. Correlation coefficient and significant *p*-value between each module and AMI
